# Supplementary material
Source: PubMed Central journal article supplement (PMC2922544)
Supplement: 1009314107_pnas.201009314SI.pdf [file 1009314107_pnas.201009314SI.pdf]

# Supporting Information

Witte et al. 10.1073/pnas.1009314107

## SI Materials and Methods

**Mice, Skeletal Preparations.** *Ror2*<sup>W749X</sup>, *Ror2*<sup>TMLacZ</sup>, and *Ihh*<sup>E95K</sup> mouse lines were described previously (1–3). *Ror2*<sup>+/-</sup> mice (4) were provided by Y. Minami (Kobe University, Kobe, Japan), *Ihh*<sup>+/-</sup> mice (5) were provided by A. P. McMahon (Harvard University, Boston, MA). *Axin2*<sup>LacZ</sup> Wnt reporter mice (6) were obtained from W. Birchmeier (Max Delbrück Center for Molecular Medicine, Berlin, Germany). Genotyping was performed using DNA prepared out of tailtip or amnion samples according to standard procedures; for primer sequences and PCR conditions see respective references. Skeletal preparations were performed according to standard protocols (7). All animal experiments were carried out in compliance with legal requirements of the European Union.

**Histology, In Situ Hybridization, Immunohistochemistry.** Whole mount in situ hybridizations on forelimbs as well as section in situ hybridizations on 7- $\mu$ m paraffin sections were performed as previously described (8). The following probes were used: *Bmpr1b* (9), *Bmp4* (10), *Collagen II alpha 1* (7), *Gli1*, *Ihh*, and *Patched1* (6, 11), *Gdf5* and *Runx2* (12), and *Sox9* (13).

Other probes were amplified using the following primers (forward/reverse):

*Nmyc*: CATCCATCAGCAGCACAACT/AAATGTGCAAA-GTGGCAGTG

*Itf2*: TGAGCTATCCATCCACTCCTC/TGTCTTGCAAG-TTCTCATCGCC

LacZ staining was performed on whole-mount and cryosection samples as described previously (14). Mutant and WT specimens used for comparison were derived from the same litters and processed in parallel.

Immunohistochemistry was performed on 7- $\mu$ m paraffin sections. Sections were deparaffinized using xylene and rehydrated in a descending series of ethanol concentrations. Antigen retrieval was performed using citrate buffer or high-pH buffer (Dako). Slides were boiled twice for 3 min and allowed to cool down to

room temperature for 30 min. After permeabilization with 0.2% Triton X-100 in PBS for 15 min and blocking with 5% normal goat serum in PBS, primary antibody incubation was performed at 4 °C in 5% normal goat serum in PBS overnight. Detection with fluorescence-conjugated secondary antibody (Molecular Probes, Invitrogen) was performed at room temperature for 1 h. Primary antibodies, dilution, and retrieval were as follows: antiactivated  $\beta$ -catenin (Upstate, 1:100, high-pH), anti-BrdU (Roche, 1:20, citrate) anti-phosphoSMAD1/5/8 (Cell Signaling, 1:200, high-pH), anti-SOX9 (Santa Cruz Biotechnology, 1:50, citrate), anti-TCF7L2 (Upstate, 1:100, high-pH), activated (cleaved) caspase 3 (Cell Signaling, 1:200, citrate). For phospho-SMAD staining, additional biotinyl tyramid signal amplification was performed according to the manufacturer's protocol (Perkin-Elmer). Sample examination was done with an AxioVert 200 fluorescence microscope, ApoTome technology, and AxioVision software (Zeiss).

**BrdU Pulse-Chase Labeling.** Mice were injected i.p. with 200  $\mu$ g BrdU per gram body weight. After 1 h incorporation was blocked by injection of a 30-fold excess of thymidine (15, 16). After an additional 10 h, mice were killed and embryos processed for immunohistology on paraffin sections. Statistical analysis was performed by counting BrdU/SOX9-positive cells in relation to SOX9-positive cells on four sections for each WT and mutant specimen. The experiment was repeated three times; mean values from the three experiments were averaged and an SE calculated from the individual SDs.

**Micromass Cultures.** Mouse micromass cultures were prepared at embryonic day 12.5 (E12.5). Limbs were collected in warm PBS and digested for 15 min at 37 °C with 3 mg/mL dispase. After washing, cells were isolated from the limb buds by digestion with 0.1% collagenase type Ia, 0.1% trypsin, and 5% FCS. Micromass cultures were plated at a density of  $3.6 \times 10^7$  cells in a 10- $\mu$ L drop. After 2 h of adhesion, 1 mL of medium (DMEM-F12, 10% FCS, 1% L-glutamine, and 1% Pen/Strep) was added and refreshed every 2 d. Alcian blue staining and quantification was performed as previously described (17).

- DeChiara TM, et al. (2000) Ror2, encoding a receptor-like tyrosine kinase, is required for cartilage and growth plate development. *Nat Genet* 24:271–274.
- Raz R, et al. (2008) The mutation ROR2W749X, linked to human BDB, is a recessive mutation in the mouse, causing brachydactyly, mediating patterning of joints and modeling recessive Robinow syndrome. *Development* 135:1713–1723.
- Gao B, et al. (2009) A mutation in *Ihh* that causes digit abnormalities alters its signalling capacity and range. *Nature* 458:1196–1200.
- Takeuchi S, et al. (2000) Mouse Ror2 receptor tyrosine kinase is required for the heart development and limb formation. *Genes Cells* 5:71–78.
- St-Jacques B, Hammerschmidt M, McMahon AP (1999) Indian hedgehog signaling regulates proliferation and differentiation of chondrocytes and is essential for bone formation. *Genes Dev* 13:2072–2086.
- Lustig B, et al. (2002) Negative feedback loop of Wnt signaling through upregulation of conductin/axin2 in colorectal and liver tumors. *Mol Cell Biol* 22:1184–1193.
- Mundlos S (2000) Skeletal morphogenesis. *Methods Mol Biol* 136:61–70.
- Stricker S, et al. (2006) Cloning and expression pattern of chicken Ror2 and functional characterization of truncating mutations in Brachydactyly type B and Robinow syndrome. *Dev Dyn* 235:3456–3465.
- Baur ST, Mai JJ, Dymecki SM (2000) Combinatorial signaling through BMP receptor IB and GDF5: Shaping of the distal mouse limb and the genetics of distal limb diversity. *Development* 127:605–619.
- Bitgood MJ, McMahon AP (1995) Hedgehog and Bmp genes are coexpressed at many diverse sites of cell-cell interaction in the mouse embryo. *Dev Biol* 172:126–138.
- Vortkamp A, et al. (1996) Regulation of rate of cartilage differentiation by Indian hedgehog and PTH-related protein. *Science* 273:613–622.
- Stricker S, Fundele R, Vortkamp A, Mundlos S (2002) Role of Runx genes in chondrocyte differentiation. *Dev Biol* 245:95–108.
- Healy C, Uwanogho D, Sharpe PT (1999) Regulation and role of Sox9 in cartilage formation. *Dev Dyn* 215:69–78.
- Lobe CG, et al. (1999) Z/AP, a double reporter for cre-mediated recombination. *Dev Biol* 208:281–292.
- Haaf T (1996) High-resolution analysis of DNA replication in released chromatin fibers containing 5-bromodeoxyuridine. *Biotechniques* 21:1050–1054.
- Schmahl J, Eicher EM, Washburn LL, Capel B (2000) Sry induces cell proliferation in the mouse gonad. *Development* 127:65–73.
- Woods CG, et al. (2006) Mutations in WNT7A cause a range of limb malformations, including Fuhrmann syndrome and Al-Awadi/Raas-Rothschild/Schinzl phocomelia syndrome. *Am J Hum Genet* 79:402–408.

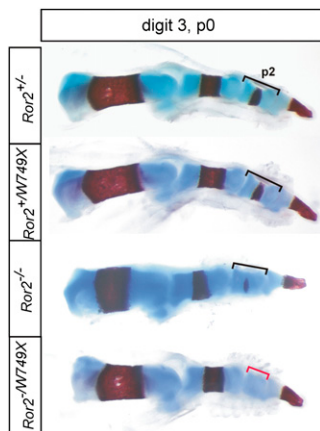

**Fig. S1.** Gain-of-function of the *Ror2*<sup>W749X</sup> allele. *Ror2*<sup>+/W749X</sup> mice were crossed to *Ror2*<sup>+/-</sup> mice. *Ror2*<sup>-/-</sup> mutants (1) exhibit severe skeletal defects but no BDB1-like phenotype, because all phalangeal condensations are present, albeit shortened, which is due to a failure of growth plate organization and chondrocyte maturation in these mutants (2). Skeletal preparations of middle fingers (digit 3) of newborn mice stained with Alcian blue (cartilage) and alizarin red (bone) are shown. *Ror2*<sup>+/W749X</sup> and *Ror2*<sup>+/-</sup> heterozygote animals have normal phalanges, whereas the *Ror2*<sup>-/-</sup> mutant has a slightly shortened middle phalanx (p2) concomitant with the delayed cartilage maturation and ossification seen in all long bones. The *Ror2*<sup>-/W749X</sup> compound mutant, however, shows a pronounced shortening of p2 that is markedly stronger than the *Ror2*<sup>-/-</sup> phenotype, indicating a gain of function for the ROR2-W749X protein, which, however, is masked by the presence of one WT *Ror2* allele in *Ror2*<sup>+/W749X</sup> mice.

1. Takeuchi S, et al. (2000) Mouse *Ror2* receptor tyrosine kinase is required for the heart development and limb formation. *Genes Cells* 5:71–78.
2. Schwabe GC, et al. (2004) *Ror2* knockout mouse as a model for the developmental pathology of autosomal recessive Robinow syndrome. *Dev Dyn* 229:400–410.

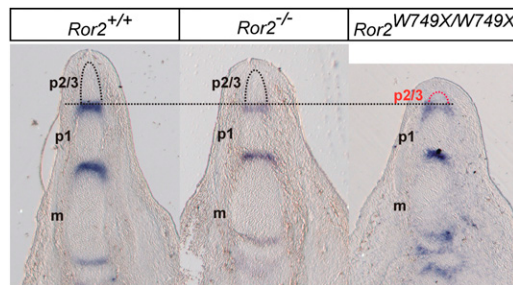

**Fig. S2.** The distal elongation defect is specific to the *Ror2*<sup>W749X/W749X</sup> mutant. Longitudinal sections (proximal is at the bottom, distal at the top) were labeled for the joint marker *Gdf5*. Pictures were arranged placing the p1-p2/3 joint on the same level (dotted line). Note that the defect in p2/3 elongation only occurred in the *Ror2*<sup>W749X/W749X</sup> mutant but not in the *Ror2*<sup>-/-</sup> mutant. m, metacarpal; p1, phalanx 1; p2/3, unseparated primordium of phalanges 2 and 3.

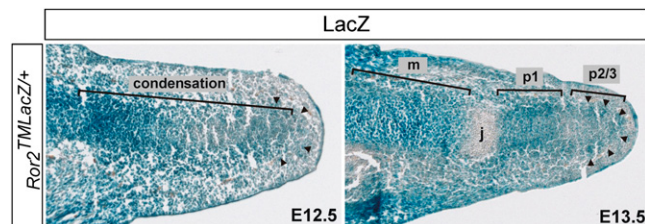

**Fig. S3.** Expression of ROR2 during digit outgrowth demonstrated by LacZ staining on longitudinal sections from *Ror2*<sup>TM<sub>LacZ</sub>+/+</sup> embryos at E12.5 and E13.5. Proximal is left, distal is right. ROR2 is expressed in cartilage condensations and other mesenchymal tissues. Note that ROR2 shows enhanced expression in distal mesenchyme undergoing chondrogenesis (arrowheads), forming the condensation of the second and third phalanges at E13.5. j, joint; m, metacarpal; p1, condensation of phalanx 1; p2/3, unseparated primordium of phalanges 2 and 3.

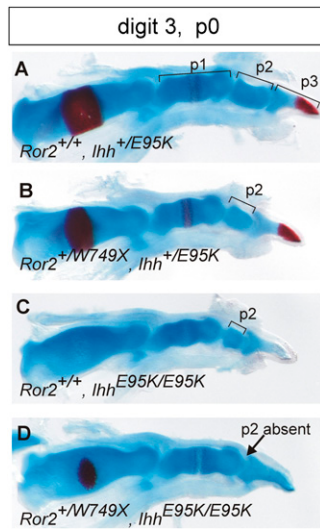

**Fig. 54.** Genetic interaction of *Ror2*<sup>W749X</sup> (BDB1 mutation) and *Ihh*<sup>E95K</sup> (BDA1 mutation). Skeletal preparations of digits 3 from newborn mice (p0) of the allelic combinations indicated were stained with Alcian blue (cartilage) and Alizarin red (bone). Note that the compound heterozygotes show increased phenotypic severity compared with the *Ihh*<sup>+E95K</sup> mutant (A and B). On the homozygous *Ihh*<sup>E95K/E95K</sup> background (C), addition of one *Ror2*<sup>W749X</sup> allele caused absence of the middle phalanx (p2), thus phenocopying *Ror2*<sup>W749X/W749X</sup> mice (D).

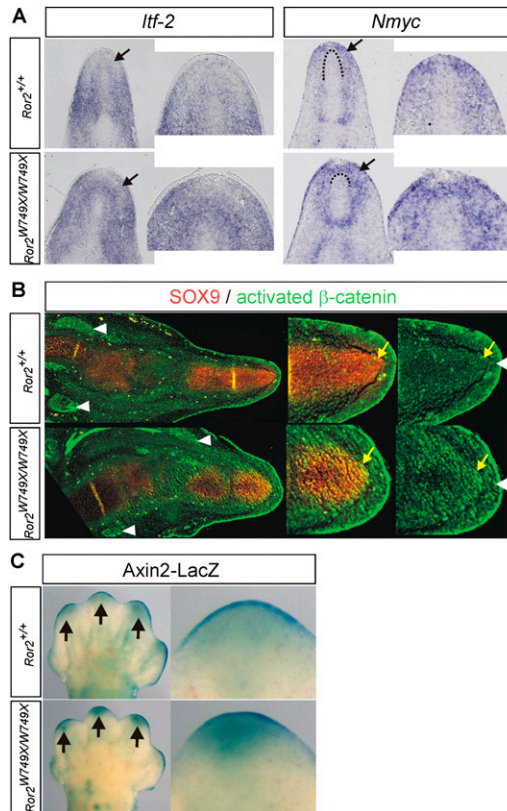

**Fig. 55.** Ectopic activation of the Wnt/ $\beta$ -catenin pathway in the distal mesenchyme of *Ror2*<sup>W749X/W749X</sup> mice. (A) Section in situ hybridization shows up-regulation of canonical Wnt targets *Itf-2* and *Nmyc* (1, 2) in distal mesenchyme (arrows, magnifications) of *Ror2*<sup>W749X/W749X</sup> mice. (B) Immunohistochemistry for SOX9 (green) and activated (dephosphorylated)  $\beta$ -catenin (red) show elevated levels of  $\beta$ -catenin in distal mesenchyme (white arrows) and especially cells undergoing chondrogenesis in *Ror2*<sup>W749X/W749X</sup> mice (note yellow staining for overlapping signal with SOX9; yellow arrows). Note the equal intensity of  $\beta$ -catenin staining in muscles between WT and *Ror2*<sup>W749X/W749X</sup> (arrowheads). (C) LacZ staining on whole-mount embryos from intercrossing the *Ror2*<sup>W749X</sup> line to the canonical Wnt reporter line *Axin2*LacZ demonstrates increased canonical pathway activity in distal mesenchyme (arrows) of *Ror2*<sup>W749X/W749X</sup> mutants.
